# Supplementary material
Source: Springer Nature journal article supplement (https://www.springermedizin.de/resource/supplementary/12885_2012_3935_MOESM3_ESM.pdf/9464794)

a MDA-MB-468

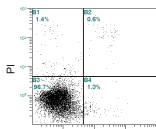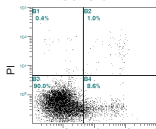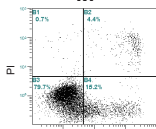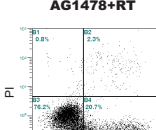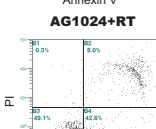

b MCF-7

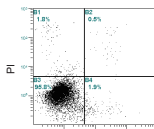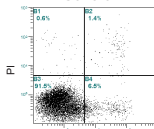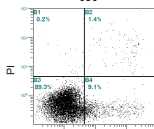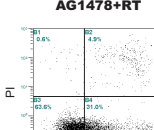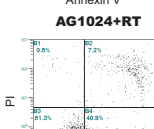

c MDA-MB-468

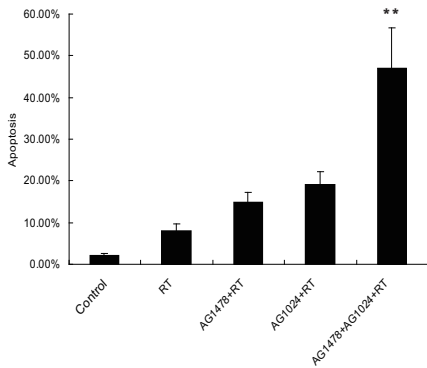

d MCF-7

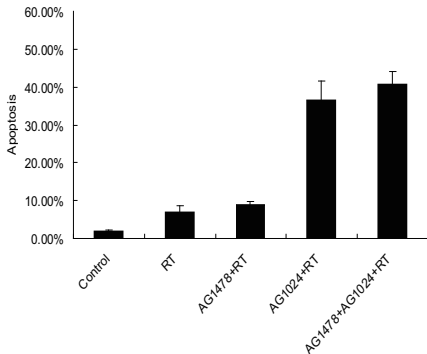

Supplement: MOESM3 [file 9464794]
